# Supplementary material
Source: PubMed Central journal article supplement (PMC4978538)
Supplement: NIHMS4476-supplement-2.pdf [file NIHMS4476-supplement-2.pdf]

**Supplementary Table 1**

|                       | Veh + Veh | Veh + Aniso | Cap + Veh | Cap + Aniso |
|-----------------------|-----------|-------------|-----------|-------------|
| <b>RM-ANOVA</b>       |           |             |           |             |
| <b>F value</b>        | 12.3      | 32.8        | 22.4      | 22.6        |
| <b>P value</b>        | <0.0001   | <0.0001     | <0.0001   | <0.0001     |
| <b>Dunnett's test</b> |           |             |           |             |
| <b>Day 1</b>          | ***       | ***         | ***       | ***         |
| <b>Day 2</b>          | ***       | ***         | ***       | ***         |
| <b>Day 2 (post)</b>   | ***       | ***         | ***       | ***         |
| <b>Day 3</b>          | ***       | ***         | ***       | ***         |
| <b>Day 4</b>          | ***       | ***         | ***       | n.s.        |
| <b>Day 5</b>          | ***       | ***         | ***       | n.s.        |
| <b>Day 6</b>          | ***       | **          | ***       | n.s.        |
| <b>Day 8</b>          | n.s.      | n.s.        | *         | n.s.        |

**Recovery from hyperalgesia after plantar injection of CFA.** The paw withdrawal thresholds ( $\text{g}\cdot\text{mm}^{-2}$ ; see Fig. 1F) on each day after CFA injection (Day 1 to Day 8) were compared to baseline withdrawal threshold to assess resolution of mechanical hyperalgesia. Day 2 (post) indicates the withdrawal threshold measured 3 hours after the plantar injection of capsaicin (Cap) or vehicle (Veh) and intrathecal injection of vehicle (Veh) or anisomycin (Aniso) that was administered on day 2. \*, \*\*\*, and "n.s." indicates  $P < 0.05$ ,  $P < 0.001$  and not significant ( $P > 0.05$ ) compared to baseline, respectively. Cap + Aniso  $n = 9$  mice; Cap + Sal  $n = 9$  mice; Veh + Aniso  $n = 8$  mice; Veh + Sal  $n = 8$  mice.
